# Supplementary material
Source: publisher figshare collection journal article supplement (https://gsapubs.figshare.com/ndownloader/files/34835997)
Supplement: Supplementary file 1 [file 34835997]

## Sheet: Sheet1
TABLE S3. SUMMARY OF AGES, EARLY VOLCANIC ROCKS IN RELATION TO THE PLATORO CALDERA COMPLEX
Sample	Unit	Location	Latitude	Longitude	Mineral	Method	Age(Ma)	±	2s*	Source	Comments
Oldest major Platoro ignimbrite (Black Mountain Tuff)			37 28.50	106 18.79	Hornblende	Plateau	30.19	±	0.16	1
	Radial dikes
Proximal to Platoro
16L-35	Andesite	Adams Fork	37 19.12	106 37.28	Hornblende	Inverse isochron	30.99	±	0.09	1
16L-32	Andesite	Platoro Reservoir	37 17.96	106 36.37	Hornblende	Inverse isochron	31.27	±	0.05	1	wt. mean
16L-32	Andesite	Platoro Reservoir	37 17.96	106 36.37	Biotite	Inverse isochron	31.31	±	0.08	1	31.28 ± .04
17AG-76	Andesite	Canõn Diablo (dike)	37 17.30	106 35.33	Groundmass	Integrated	31.81	±	0.16	2
Distal
16L-1	Fine-grain andesite	Blanco Basin road	37 12.48	106 49.94	Groundmass	Inverse isochron	30.17	±	0.08	1
16L-55	Dacite	Jim Creek	37 15.49	106 24.90	Sanidine	Mean	30.36	±	0.03	1
16L-51	Andesite	Fish Creek	37 13.02	106 42.29	Hornblende	Inverse isochron	30.72	±	0.06	1
16KA-02	Andesite	Flattop Mountain	37 11.67	106 43.74	Hornblende	Inverse isochron	31.14	±	0.03	1
	Lava and volcaniclastic units
Proximal to Platoro
Cov-10v	Willow Mtn M??	Green Ridge	--	--	Biotite	Plateau	29.7382	±	0.4	3	Slightly young
Cov-154	Willow Mountain M	Conejos River valley	--	--	Biotite	Plateau	31.4815	±	0.4	3
Cov-87a	Horseshoe Mtn M	NE slope, Pintada Mtn	--	--	Hornblende	Plateau	32.2711	±	0.85	3
Cov-48a	Horseshoe Mtn M??	Willow Mountain	--	--	Hornblende	Plateau	32.63	±	0.22	3	Likely WMM?
Cov-75	Horseshoe Mtn M	Rock Creek	--	--	Hornblende	Plateau	33.7375	±	0.6	3
Cov-130	Horseshoe Mtn M	Pintada Mountain	--	--	Biotte	Plateau	33.7375	±	0.6	3	wt. mean
Cov-130	Horseshoe Mtn M	Pintada Mountain	--	--	Hornblende	Plateau	34.1476	±	1	3	33.85 ± 0.4
Distal
15L-31	Upper conglomerate	S Wolf Cr Pass, Hwy 160	37 28.08	106 52.51	Plagioclase	Inverse isochron	30.59	±	0.09	1	Bio sep failed
68L-91	Mafic dacite	Navajo Peak	--	--	Biotite	K-Ar	33.8075	±	1.3	4
15L-32	Basal dacitic breccia	Treasure Falls, Hwy 160	37 26.63	106 52.66	Biotite	Inverse isochron	35.47	±	0.08	1	wt. mean
15L-32	Basal dacitic breccia	Treasure Falls, Hwy 160	37 26.63	106 52.66	Hornblende	Inverse isochron	35.36	±	0.07	1	35.41±0.11
*All ages recalculated to FCT at 28.201 Ma
Data sources: 1. Lipman and Zimmerer, 2019; 2. Analysis by A. Gilmer, Table DR6; 3. Colucci, 1990, Colucci et al., 1991; 4. Lipman et al., 1970
Supplemental references:
Colucci, M., 1990,Precaldera lavas of the southeast San Juan volcanic field: PhD thesis, Southern Methodist University, 86 pp
Lipman, P.W., and Zimmerer, M.J., 2019, Magmato-tectonic links: Ignimbrite calderas, regional dike swarms,
and the transition from arc to rift in the Southern Rocky Mountains: Geosphere, v. 15, p.1893-1926

## Sheet: G49964
Lipman, P.W., Zimmerer, M.J., and Gilmer, A.K., 2022, Early incubation and prolonged maturation of large ignimbrite magma bodies: Evidence from the Southern Rocky Mountain volcanic field, Colorado, USA: Geology, v. 50, https://doi.org/10.1130/G49964.1
